# Supplementary material for: Feasibility of the SOAR (Stop OsteoARthritis) program
Source: PubMed Central journal article supplement — Osteoarthr Cartil Open. 2022 Jan 28;4(1):100239. doi: 10.1016/j.ocarto.2022.100239 (PMC9718224; doi:10.1016/j.ocarto.2022.100239), 2022-01-28
Supplement: mmc2.pdf [file mmc2.pdf]

**SUPPLEMENTARY FILE 2: Efficacy Outcomes without Participant 62**

**Table 5: SOAR Efficacy Outcomes (sensitivity analysis)**

| Outcome              | Women (n=18)                 |                         |                        | Men (n=12)                   |                         |                        |
|----------------------|------------------------------|-------------------------|------------------------|------------------------------|-------------------------|------------------------|
|                      | Baseline<br>Median (min-max) | End<br>Median (min-max) | Change<br>Mean (95%CI) | Baseline<br>Median (min-max) | End<br>Median (min-max) | Change<br>Mean (95%CI) |
| KOOS <sub>Pain</sub> | 83 (58-100)                  | 86 (53-100)             | 3.0 (-.4,6.3)          | 88 (69-97)                   | 86 (75-100)             | 2.1 (-3.3,7.5)         |
| KOOS <sub>Symp</sub> | 57 (39-79)                   | 54 (39-75)              | 1.7 (-2.0,5.4)         | 57 (43-71)                   | 63 (43-68)              | 1.2 (-4.2,6.6)         |
| KOOS <sub>ADL</sub>  | 96 (79-100)                  | 99 (75-100)             | 1.0 (-2.3,4.4)         | 98 (81-100)                  | 96 (81-100)             | 0.6 (-3.4,4.6)         |
| KOOS <sub>SR</sub>   | 70 (45-95)                   | 90 (55-100)             | <b>12.1 (4.4,19.7)</b> | 75 (50-100)                  | 75 (50-100)             | 3.8 (-6.7,14.1)        |
| KOOS <sub>QoL</sub>  | 50 (25-81)                   | 56 (25-88)              | <b>8.8 (4.4,19.7)</b>  | 50 (25-88)                   | 56 (44-88)              | 6.8 (-2.5,16.1)        |
| KOOS <sub>PF</sub>   | 75 (41-91)                   | 82 (55-96)              | <b>9.2 (1.9,15.7)</b>  | 76 (50-91)                   | 71 (57-96)              | 1.5 (-6.2,9.2)         |
| PSFS <sup>1</sup>    | 5 (0-7)                      | 6 (2-9)                 | <b>1.7 (0.5,2.9)</b>   | 6 (3-8)                      | 6 (4-8)                 | -0.4 (-1.9,1.1)        |
| PHS                  | 19 (5-37)                    | 8 (0-32)                | <b>-7 (-11,-3)</b>     | 20 (0-41)                    | 11 (2-30)               | -5 (-13,4)             |
| GLTQ <sup>2</sup>    | 55 (13-118)                  | 70 (37-224)             | <b>23 (7,39)</b>       | 66 (23-92)                   | 90 (35-185)             | <b>31 (8,54)</b>       |

<sup>1</sup>Average across three goals

<sup>2</sup>Metabolic equivalents
